# The Native Copper- and Zinc- Binding Protein Metallothionein Blocks Copper-Mediated A $\beta$ Aggregation and Toxicity in Rat Cortical Neurons

Roger S. Chung<sup>1\*</sup>, Claire Howells<sup>1</sup>, Emma D. Eaton<sup>1</sup>, Lana Shabala<sup>1</sup>, Kairit Zovo<sup>2</sup>, Peep Palumaa<sup>2</sup>, Rannar Sillard<sup>2</sup>, Adele Woodhouse<sup>1</sup>, William R. Bennett<sup>1</sup>, Shannon Ray<sup>1</sup>, James C. Vickers<sup>1</sup>, Adrian K. West<sup>1</sup>

**1** NeuroRepair Group, Menzies Research Institute, University of Tasmania, Hobart, Australia, **2** Department of Gene Technology, Tallinn Technical University, Tallinn, Estonia

## Abstract

**Background:** A major pathological hallmark of AD is the deposition of insoluble extracellular  $\beta$ -amyloid (A $\beta$ ) plaques. There are compelling data suggesting that A $\beta$  aggregation is catalysed by reaction with the metals zinc and copper.

**Methodology/Principal Findings:** We now report that the major human-expressed metallothionein (MT) subtype, MT-2A, is capable of preventing the *in vitro* copper-mediated aggregation of A $\beta$ <sub>1–40</sub> and A $\beta$ <sub>1–42</sub>. This action of MT-2A appears to involve a metal-swap between Zn<sub>7</sub>-MT-2A and Cu(II)-A $\beta$ , since neither Cu<sub>10</sub>-MT-2A or carboxymethylated MT-2A blocked Cu(II)-A $\beta$  aggregation. Furthermore, Zn<sub>7</sub>-MT-2A blocked Cu(II)-A $\beta$  induced changes in ionic homeostasis and subsequent neurotoxicity of cultured cortical neurons.

**Conclusions/Significance:** These results indicate that MTs of the type represented by MT-2A are capable of protecting against A $\beta$  aggregation and toxicity. Given the recent interest in metal-chelation therapies for AD that remove metal from A $\beta$  leaving a metal-free A $\beta$  that can readily bind metals again, we believe that MT-2A might represent a different therapeutic approach as the metal exchange between MT and A $\beta$  leaves the A $\beta$  in a Zn-bound, relatively inert form.

**Citation:** Chung RS, Howells C, Eaton ED, Shabala L, Zovo K, et al. (2010) The Native Copper- and Zinc- Binding Protein Metallothionein Blocks Copper-Mediated A $\beta$  Aggregation and Toxicity in Rat Cortical Neurons. PLoS ONE 5(8): e12030. doi:10.1371/journal.pone.0012030

**Editor:** Ashley I. Bush, Mental Health Research Institute of Victoria, Australia

**Received:** January 18, 2010; **Accepted:** July 15, 2010; **Published:** August 11, 2010

**Copyright:** © 2010 Chung et al. This is an open-access article distributed under the terms of the Creative Commons Attribution License, which permits unrestricted use, distribution, and reproduction in any medium, provided the original author and source are credited.

**Funding:** This work was supported by research grants from the Australian Research Council (ARC, ID# DP0556630; DP0984673; LP0774820), National Health and Medical Research Council (ID# 490025, 544913) and Jack & Ethel Goldin Foundation. RSC holds an ARC Research Fellowship. The funders had no role in study design, data collection and analysis, decision to publish, or preparation of the manuscript.

**Competing Interests:** The authors have declared that no competing interests exist.

\* E-mail: Roger.Chung@utas.edu.au

## Introduction

Alzheimer's disease (AD) is the most common form of dementia within the ageing population. AD accounts for between 50% and 60% of dementia cases [1]. The pathological hallmarks of the disease include extracellular  $\beta$ -amyloid (A $\beta$ ) plaques, intracellular neurofibrillary tangles and dystrophic neurites [2]. All of these hallmarks arise from the abnormal and unregulated overproduction of insoluble proteinaceous structures. These proteinaceous structures are responsible for the disruption to normal cellular functioning ultimately leading to cell death.

The main constituents of A $\beta$  plaques are the 40- and 42-mer peptides, A $\beta$ <sub>1–40</sub> and A $\beta$ <sub>1–42</sub> [3], which associate to form abnormal extracellular deposits of fibrils and amorphous aggregates [4]. A $\beta$  is derived from the  $\beta$ -amyloid precursor peptide (APP), which is a normal protein [5,6] that is produced by neuronal and non-neuronal cells [7,8]. APP is processed by a combination of  $\alpha$ -,  $\beta$ -, and/or  $\gamma$ -secretases to form numerous protein products. The plaque-forming A $\beta$ <sub>1–42</sub> and A $\beta$ <sub>1–40</sub> arise from the uncommon  $\beta$ - and  $\gamma$ -secretase cleavage of the APP.

The mechanisms underlying the aggregation of A $\beta$  have been the subject of intense investigation. There is compelling data to

suggest that the aggregation of A $\beta$  is catalysed by reaction with the metals zinc and copper. Cu-mediated aggregation of A $\beta$  leads to the formation of copper-bound, SDS-insoluble A $\beta$  aggregates, that are neurotoxic due to the ability of A $\beta$ -bound copper to undergo redox reactions at the cell membrane to generate reactive oxygen species [9,10]. Of note, A $\beta$  plaques deposited in the AD brain are found to be enriched with metals, and in particular copper [11,12].

Metallothioneins (MTs) are the major endogenous zinc- and copper- binding protein within the brain. The MT-1/2 isoforms (exemplified by the highly expressed member, MT-2A) are characterised as highly neuroprotective proteins essential for brain repair [13–15]. The metal-binding properties of MT-1/2 have been well investigated, and it is recognised that these proteins are capable of binding 7 divalent (Zn<sup>2+</sup>) and up to 12 monovalent (Cu<sup>+</sup>) metal ions *in vivo* through two distinct metal-thiolate clusters, termed the  $\alpha$ - and  $\beta$ - domains [16]. The importance of MT in maintaining metal homeostasis is clearly demonstrated in studies involving exposure to heavy metals (either by diet or environment) in MT-1/2 knockout mice, which leads to metal toxicity, while MT-1/2 overexpressing mice are relatively protected from heavy metal toxicity [see review, 17]. MTs also have important roles in

copper homeostasis, evidenced by the crossing of a mouse model of Menkes disease (a copper efflux disease) with MT-1/2 knockout mice, which results in embryonic lethality [18].

Given the strong metal-binding properties of MT, we predict that these proteins may be involved in regulating the metal-binding and subsequent aggregation of A $\beta$ . Indeed, there is substantial literature supporting a role for MTs in the pathophysiology of AD. These proteins are expressed by astrocytes, and their expression is significantly upregulated in regions of A $\beta$  plaque pathology in the pre-clinical [19] and clinical AD brain [20,21], as well as in the brains of transgenic AD mice [22]. Notably, Meloni et al [23] recently reported that the Zn(II)-MT-3 isoform is capable of exchanging metals with Cu(II)-A $\beta$  to prevent the formation of SDS-insoluble Cu(II)-A $\beta$  aggregates. The goal of this study is to evaluate whether MT-2A, via its zinc- and copper-binding properties, also represents an endogenous protective mechanism against A $\beta$  aggregation and toxicity.

## Results

### MT-2A prevents copper-mediated formation of SDS-insoluble A $\beta$ aggregates

To stimulate A $\beta$  aggregation, 25 $\mu$ M of A $\beta_{1-40}$  was mixed with an equimolar concentration of copper and 200 $\mu$ M ascorbate, and shaken at 300rpm for three days at 37°C. The resultant protein aggregates were collected by ultracentrifugation, resuspended in SDS-PAGE loading buffer and electrophoresed. Under these conditions, no A $\beta_{1-40}$  was visualised on SDS-PAGE (Figure 1A), as a consequence of the formation of copper-bound SDS-insoluble aggregates (IA). In contrast, in the presence of Zn<sub>7</sub>MT-2A at the range of 2.5–25 $\mu$ M, A $\beta_{1-40}$  formed aggregates (SA)(Figure 1B), which dissolved in SDS and resolved as a single band on SDS-PAGE of approximately 3–4kDa representing monomeric A $\beta_{1-40}$  (Figure 1A). As shown recently by Meloni et al [23] the structurally related metallothionein isoform Zn<sub>7</sub>MT-3 was also capable

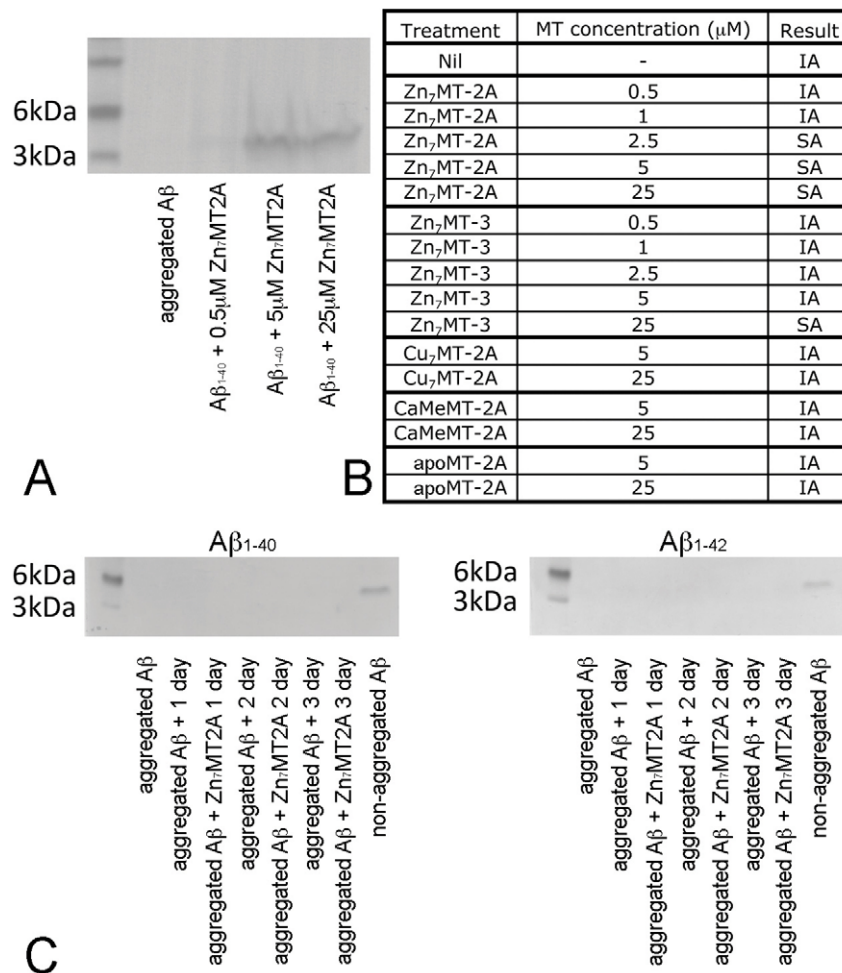

**Figure 1. 25 $\mu$ M A $\beta_{1-40}$ , in the presence of 25 $\mu$ M copper and 200 $\mu$ M ascorbate, was incubated at 37°C for three days with shaking at 300rpm.** This resulted in the formation of SDS-insoluble A $\beta$  aggregates (IA), which were not visualised on SDS-PAGE (A). The presence of Zn<sub>7</sub>MT2A (5–25 $\mu$ M) prevented formation of SDS-insoluble A $\beta$  aggregates (A). Instead, SDS-soluble aggregates (SA) were formed, that were resolved as a single protein band of approximately 3–4kDa size, representing monomeric A $\beta_{1-40}$  peptide (A). A range of different MT forms were tested for the ability to promote formation of SDS-soluble aggregates (SA)(B). Zn<sub>7</sub>MT-2A promoted formation of SDS-SA, and Zn<sub>7</sub>MT-3 had a similar effect but at 10-fold higher concentration (B). The ability of MT-2A to prevent formation of SDS-IA was linked to metal-binding properties, as different metallated forms of MT-2A had different effects upon A $\beta$  aggregation (B). When Cu-A $\beta_{1-40}$  or Cu-A $\beta_{1-42}$  aggregates were generated by three days of incubation, and then incubated with shaking in the presence or absence of 25 $\mu$ M Zn<sub>7</sub>MT-2A for up to three days, this was unable de-aggregate either Cu-A $\beta_{1-40}$  or Cu-A $\beta_{1-42}$  pre-formed aggregates (C). doi:10.1371/journal.pone.0012030.g001

of preventing formation of SDS-insoluble A $\beta$ <sub>1-40</sub> aggregates, but required a 10-fold higher concentration than Z<sub>n</sub>7MT-2A (Figure 1B). We also investigated whether Z<sub>n</sub>7MT-2A can prevent the Cu-mediated aggregation of A $\beta$ <sub>1-42</sub>. Under the same experimental conditions, 25  $\mu$ M Z<sub>n</sub>7MT-2A was able to completely prevent Cu-A $\beta$ <sub>1-42</sub> forming SDS-insoluble aggregates (results not shown).

We also investigated whether MT-2A can de-aggregate pre-formed Cu-A $\beta$  aggregates. Cu-A $\beta$ <sub>1-40</sub> and Cu-A $\beta$ <sub>1-42</sub> aggregates were produced as described above (three day incubation), after which time 25  $\mu$ M of Z<sub>n</sub>7MT-2A was added. However, incubation with Z<sub>n</sub>7MT-2A for up to three days was unable to de-aggregate either Cu-A $\beta$ <sub>1-40</sub> or Cu-A $\beta$ <sub>1-42</sub> pre-formed aggregates (Figure 1C).

To establish whether the metallation state of MT is responsible for the ability of MT-2A to prevent aggregation of A $\beta$ <sub>1-40</sub> into SDS-IA, several different metallated forms of MT-2A were used. We found that Cu<sub>10</sub>MT-2A was not able to prevent the formation of SDS-insoluble A $\beta$ <sub>1-40</sub> aggregates (Figure 1). Furthermore, chemical modification of MT-2A to block metal binding, by means of carboxymethylation of cysteine residues (CaMeMT-2A) abolished the ability of MT-2A to prevent formation of insoluble A $\beta$ <sub>1-40</sub> aggregates (Figure 1). Finally, metal free (apo) MT-2A was also unable to prevent copper-mediated formation of insoluble A $\beta$ <sub>1-40</sub>. Based upon these observations, we predict that the zinc bound to MT is required for the ability of MT to block copper-mediated A $\beta$ <sub>1-40</sub> aggregation.

### Evidence that Z<sub>n</sub>7MT-2A prevents copper-mediated A $\beta$ aggregation via metal exchange

One possible explanation for our observations is that there is a metal exchange of copper and zinc between Z<sub>n</sub>7MT-2A and Cu(II)A $\beta$  with the subsequent formation of Zn-bound A $\beta$  aggregates and soluble Cu-bound MT. To test this hypothesis, the amount of copper and zinc present in the aggregated A $\beta$  samples was determined using inductively coupled plasma mass spectrometry (ICP-MS). When A $\beta$ <sub>1-40</sub> was aggregated for three days in the presence of copper and ascorbate, the amount of copper/zinc detected within the pellet fraction following ultracentrifugation was 89.2/27.1ng (Table 1). However, when A $\beta$ <sub>1-40</sub> was aggregated in the presence of Z<sub>n</sub>7MT-2A, the amount of copper present in the pellet fraction was significantly reduced to 47.5ng (approximately 53% decrease), while there was a concomitant increase in zinc to 81.4ng (Table 1). There was no change in copper/zinc levels however when CaMeMT-2A was used (Table 1). This provides further evidence that a copper-zinc

exchange has occurred between Cu(II)-A $\beta$  and Z<sub>n</sub>7MT-2A. We therefore predict that the action of MT-2A to prevent the formation of insoluble A $\beta$  aggregates is due to metal exchange of copper and zinc between Z<sub>n</sub>7MT-2A and Cu(II)A $\beta$  with the subsequent formation of Zn-bound A $\beta$  which only forms soluble protein aggregates.

### Comparative measurement of the relative Cu(I)-binding affinity of MT-2A with MT-3

An explanation for the different abilities of MT-2A and MT-3 to alter Cu(II)-A $\beta$  aggregation might lie in different copper-binding properties of MT-2A and MT-3. Formal thermodynamic analysis indicated that MT-3 has only slightly lower apparent Cu(I)-binding affinity ( $K_{Cu} = 0.47 \pm 0.01$  fM) (Figure 2A) as compared with that which we have recently reported for MT-2A ( $K_{Cu} = 0.41 \pm 0.02$  fM) [24]. However, differences were observed in the composition and affinities of individual copper-thiolate clusters of MT-2 and MT-3. In ESI-MS studies in the presence of 10mM DTT, we observed that copper was bound to MT-3 in a mixture of major Cu<sub>12</sub>MT-3 and minor Cu<sub>10</sub>MT-3 forms (Figure 2B), while we have recently reported that MT-2A is predominantly found in Cu<sub>10</sub>MT-2A form [24]. Addition of the high affinity Cu(I)-binding chelator DETC at 0.5 mM concentration was sufficient to convert Cu<sub>12</sub>MT-3 to a predominant Cu<sub>6</sub>MT-3 form, which could be further demetallated to apo-MT-3 at 3 mM DETC (Figure 2B). These observations indicate that MT-3 binds copper in two distinct hexacopper clusters exposing different Cu(I)-binding affinities. Conversely however, Cu<sub>10</sub>MT-2A was stable at up to 1.0 mM DETC, and that 1.5mM DETC was required to partially demetallate Cu<sub>10</sub>MT-2A to Cu<sub>6</sub>MT-2A [24]. This suggests that tetracopper-thiolate cluster in Cu<sub>10</sub>MT-2A has higher Cu(I)-binding affinity than low-affinity hexacopper-thiolate cluster in Cu<sub>12</sub>MT-3, and may account for the greater ability of MT-2A to prevent Cu(II)-A $\beta$  aggregation compared to MT-3. We predict from the amino acid composition of MT-2A and MT-3 that due to their high sequence homology that the N-terminal  $\beta$ -domains will share similar metal-binding properties (Figure 2C), most likely corresponding to the hexacopper-thiolate cluster that is demetallated by treatment with 3mM DETC. Subsequently, the C-terminal  $\alpha$ -domain is likely to represent the metal thiolate cluster that differs between the two isoforms and which may contribute to the different copper-binding properties of MT-2A and MT-3. To test this hypothesis we switched the domains between isoforms to form chimeric recombinant MT-3 $\beta$ 2 $\alpha$  and MT-2 $\beta$ 3 $\alpha$  proteins (note the the beta-domains of each chimera are at the N-terminus, which is the same as native MTs). Indeed, Z<sub>n</sub>7MT-3 $\beta$ 2 $\alpha$  was capable of preventing copper mediated A $\beta$  aggregation to a similar degree as Z<sub>n</sub>7MT-2A, while the Z<sub>n</sub>7MT-2 $\beta$ 3 $\alpha$  chimeric protein had a similar activity to Z<sub>n</sub>7MT-3 (Figure 2D).

### MT-2A protects against A $\beta$ toxicity in cultured cortical neurons

It has been reported previously that Cu(II)-A $\beta$ <sub>1-40</sub> but not Zn(II)-A $\beta$ <sub>1-40</sub> is toxic to cultured neurons [12,25]. The combination of equimolar concentrations of A $\beta$ <sub>1-40</sub> and Cu(II) ions results in all free copper becoming rapidly bound to A $\beta$ <sub>1-40</sub> to form Cu(II)-A $\beta$ <sub>1-40</sub> [23]. We maintained rat cortical neurons for three days *in vitro* (3DIV) followed by treatment with 40  $\mu$ M Cu(II)-A $\beta$ <sub>1-40</sub> and 300  $\mu$ M ascorbate. After 24 hours, this treatment resulted in about an 80% reduction in cell viability, as measured using an alamarBlue<sup>®</sup> cell viability assay (Figure 3A). In parallel experiments we performed direct cell counts to validate the alamarBlue<sup>®</sup> data, and observed a

**Table 1.** 25  $\mu$ M A $\beta$ <sub>1-40</sub> was mixed with 25  $\mu$ M copper and 200  $\mu$ M ascorbate (rapidly forming Cu(II)-A $\beta$ ), and incubated with shaking at 37°C for 72 hours, resulting in the formation of aggregated A $\beta$ <sub>1-40</sub>.

| Reaction                                                          | Copper (ng) | Zinc (ng) |
|-------------------------------------------------------------------|-------------|-----------|
| 40mM Cu(II)-A $\beta$ <sub>1-40</sub>                             | 89.2        | 27.1      |
| 40mM Cu(II)-A $\beta$ <sub>1-40</sub> +25mM Z <sub>n</sub> 7MT-2A | 47.5*       | 81.4*     |
| 40mM Cu(II)-A $\beta$ <sub>1-40</sub> +25mM CaMeMT-2A             | 87.9        | 27        |

Pellets containing A $\beta$ <sub>1-40</sub> were collected by ultracentrifugation, and the content of copper and zinc in the pellet samples was measured by ICP-MS. All samples were performed in triplicate, and the average presented. Cu(II)-A $\beta$ <sub>1-40</sub> aggregation in the presence of Z<sub>n</sub>7MT-2A resulted in a significant reduction in the amount of copper (and increase in zinc) present in the aggregated A $\beta$ <sub>1-40</sub> pellet in comparison to Cu(II)-A $\beta$ <sub>1-40</sub> aggregated in the absence of MT-2A ( $p < 0.05$ , t-test).  
doi:10.1371/journal.pone.0012030.t001

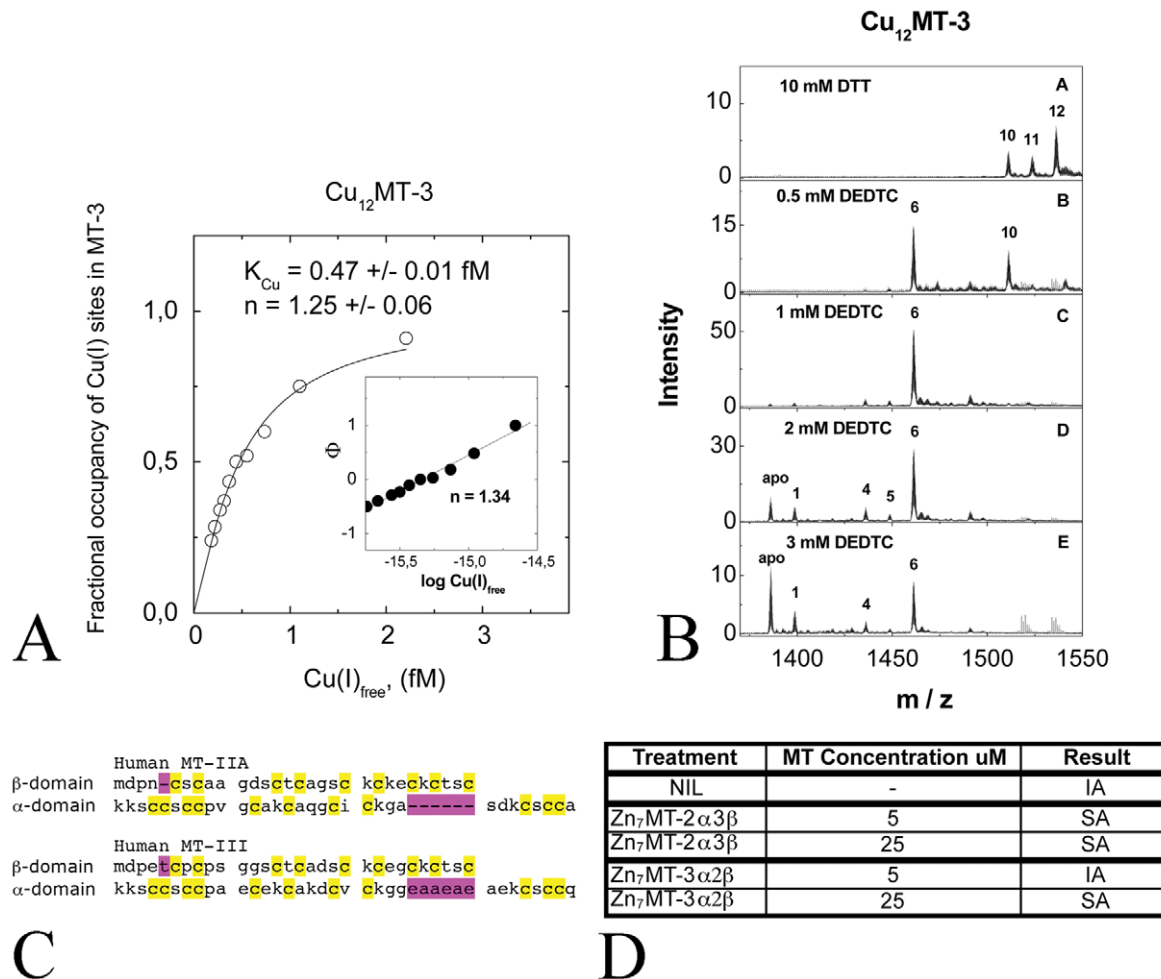

**Figure 2. Using ESI-MS, we determined that the Cu(I)-binding affinity of MT-3 ( $K_{Cu}$ ) is equal to  $0.47 \pm 0.01$  fM (A). To investigate the binding affinities of the individual copper-thiolate clusters of MT-3, we exposed Cu<sub>12</sub>MT-3 to the high affinity Cu(I)-binding chelator DETC (B). At 0.5 mM concentration DETC, Cu<sub>12</sub>MT-3 converted to a predominant Cu<sub>6</sub>MT-3 form, which could be further demetallated to apo-MT-3 at 3 mM DETC (B). Human MT-3 shares approximately 60% amino acid sequence homology with human MT-2A (C). Conserved cysteines are highlighted in yellow, and amino acid insertions indicated in purple. Zn<sub>7</sub>MT-3 $\beta$ 2 $\alpha$  was able to prevent formation of SDS-insoluble A $\beta$ <sub>1-40</sub> aggregates (IA), while Zn<sub>7</sub>MT-2 $\beta$ 3 $\alpha$  could only prevent insoluble aggregate formation at a concentration of 25  $\mu$ M (D). doi:10.1371/journal.pone.0012030.g002**

comparable degree of neurotoxicity in the presence of 40  $\mu$ M Cu(II)-A $\beta$ <sub>1-40</sub> (Figure S1). We found that Zn<sub>7</sub>MT-2A blocked A $\beta$ -induced toxicity in a dose dependent manner (5–20  $\mu$ M range), with almost complete protection at a concentration of 20  $\mu$ M Zn<sub>7</sub>MT-2A (Figure 3A). Furthermore, 20  $\mu$ M of Zn<sub>7</sub>MT-2A was far more effective in protecting against Cu(II)-A $\beta$  neurotoxicity than 20  $\mu$ M Zn<sub>7</sub>MT-3 (Figure 3A). Immunolabelling of neurons for the cytoskeletal protein tau demonstrated that Zn<sub>7</sub>MT-2A protected against Cu(II)-A $\beta$  induced neuronal degeneration (Figure 3B–D). Treatment with ascorbate or A $\beta$ <sub>1-40</sub> alone had no effect upon viability (results not shown). Note that addition of MT-3 to neuronal cultures can have powerful neurotoxic effects in its own right, if applied in the presence of a brain derived extract or serum [26,27], neither of which are present here. In contrast, in the absence of these agents, MT-3 alone has no discernible neurotoxic effect.

To further investigate whether it is Cu(II)-A $\beta$  and not free copper that is responsible for neurotoxicity, we fractionated a 40  $\mu$ M Cu(II)-A $\beta$  solution on a PD MidiTrap<sup>TM</sup> G-25 column and determined the protein (A280) and metal (ICP-MS) content of each fraction. Only those fractions containing peptide also contained copper (Figure 4A),

indicating that the Cu(II)-A $\beta$  solution did not contain any free copper ions. The neurotoxicity of all fractions was subsequently tested, and only those containing Cu(II)-A $\beta$  exhibited neurotoxic activity (Figure 4B), demonstrating that Cu(II)-A $\beta$  is responsible for the neurotoxicity that we have observed in our experiments.

To investigate whether MT-2A acts protectively via the zinc-copper metal exchange between Zn<sub>7</sub>MT-2A and Cu(II)-A $\beta$  described above, Cu<sub>10</sub>MT-2A was used in the place of Zn<sub>7</sub>MT-2A, which resulted in no neuroprotection against Cu(II)-A $\beta$  (Figure 5A). This suggests that the metal exchange between MT-2A and Cu(II)-A $\beta$  is required for neuroprotection. Notably, Cu<sub>10</sub>MT-2A alone was not toxic to neurons (Figure 5A), confirming that when copper is bound to MT it is unable to produce ROS. In parallel experiments, we found that Zn<sub>7</sub>MT-2A was only able to mildly block the neurotoxicity of H<sub>2</sub>O<sub>2</sub> when applied to cultured neurons (Figure 5B). The amount of H<sub>2</sub>O<sub>2</sub> directly applied to the neurons was physiologically relevant as Huang and colleagues [28] found that 10  $\mu$ M A $\beta$ <sub>1-40</sub> or A $\beta$ <sub>1-42</sub> may generate up to 25  $\mu$ M H<sub>2</sub>O<sub>2</sub> in 1 hour in the presence of substoichiometric amounts of Cu(II), depending on the oxygen tension. Since H<sub>2</sub>O<sub>2</sub> is the direct ROS product of the interaction of

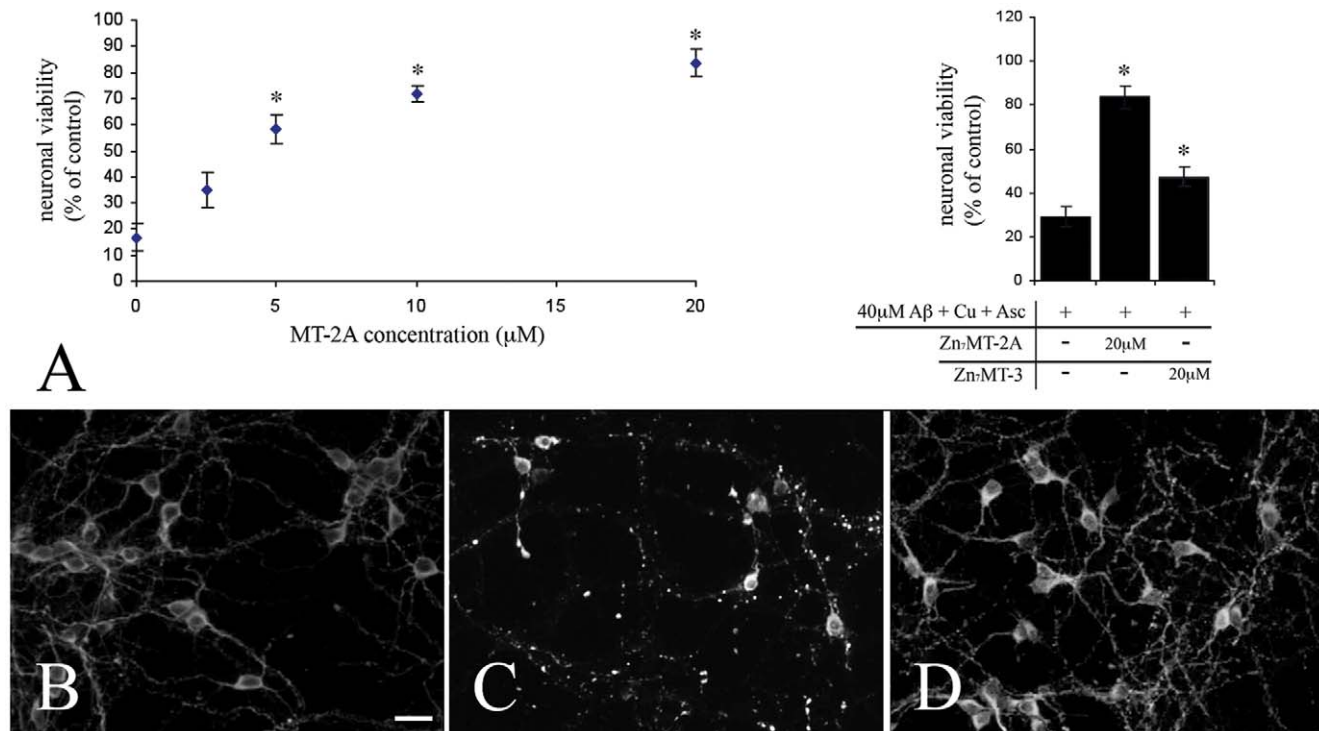

**Figure 3. Treatment of 3DIV rat cortical neuron cultures with 40µM A $\beta$ <sub>1-40</sub> (in the presence of 40µM CuCl<sub>2</sub> and 300µM ascorbate) resulted in approximately 80% reduction in neuronal viability 24 hours after treatment (A). 20µM of Zn<sub>7</sub>MT-2A was far more effective in protecting against A $\beta$ <sub>1-40</sub> neurotoxicity than 20µM Zn<sub>7</sub>MT-3 (A). Immunolabelling for tau demonstrated smooth cytoskeletal labelling in control (B) neurons, which became punctate and disassociated following Cu(II)A $\beta$ <sub>1-40</sub> treatment (C). Treatment with 20µM Zn<sub>7</sub>MT-2A prevented A $\beta$ -induced structural changes in the neuronal cytoskeleton (D). Scale bar = 25µm. doi:10.1371/journal.pone.0012030.g003**

Cu(II)-A $\beta$  with cells [23], this suggests that the protective action of Zn<sub>7</sub>MT-2A is primarily upstream of ROS production. This is consistent with our results suggesting that Zn<sub>7</sub>MT-2A acts via a metal swap with Cu(II)-A $\beta$  to prevent ROS formation.

To further confirm that Zn<sub>7</sub>MT-2A is blocking the detrimental effects of oxidative stress induced by Cu(II)-A $\beta$ , we have measured changes in ionic homeostasis of neurons in response to Cu(II)-A $\beta$  using a microelectrode ion flux measuring (MIFE) technique. The MIFE technique allows direct measurement in changes in K<sup>+</sup> and Ca<sup>2+</sup> fluxes in response to Cu(II)-A $\beta$ . Treatment with Cu(II)A $\beta$ <sub>1-40</sub> (in the presence of ascorbate) induced a rapid efflux of K<sup>+</sup> out of neurons, peaking at 4.2±0.65 min after Cu(II)-A $\beta$  application with K<sup>+</sup> outflow continuing over a period of 20 minutes (Figure 6A). The treatment also led to a moderate influx of Ca<sup>2+</sup>, peaking at 6.45±1.35 min after the Cu(II)-A $\beta$  application (indicated by crossing zero line) with Ca<sup>2+</sup> uptake continuing over the experimental period (Figure 6C). Treatment with Zn<sub>7</sub>MT-2A completely blocked Cu(II)-A $\beta$  induced changes in K<sup>+</sup> and Ca<sup>2+</sup> fluxes, at a concentration of >5µM (Figure 6B, D). Individual treatments with either A $\beta$ <sub>1-40</sub> or Zn<sub>7</sub>MT-2A alone (in the presence of ascorbate) had no effect upon any of the ions measured (results not shown).

## Discussion

The major findings of this study are that the major human-expressed subtype of metallothionein, MT-2A, is capable of preventing the formation of the toxic Cu-mediated aggregates of A $\beta$ <sub>1-40</sub> and A $\beta$ <sub>1-42</sub>. This action of MT-2A appears to involve a metal-swap between Zn<sub>7</sub>MT-2A and Cu(II)-A $\beta$  since neither

Cu<sub>10</sub>MT-2A or carboxymethylated MT-2A blocked Cu(II)-A $\beta$  aggregation. Furthermore, Zn<sub>7</sub>MT-2A blocked Cu(II)-A $\beta$ <sub>1-40</sub> induced neurotoxicity of cultured cortical neurons. We propose that there is therapeutic potential in a MT-2A based approach to reducing A $\beta$  deposition in AD.

It is well established that MT-1/2 expression is elevated in response to almost all forms of stress to the brain, including traumatic-, ischaemic or chemical- brain injury [25,29,30], or in neurodegenerative conditions such as ALS or EAE (an experimental animal model of multiple sclerosis). The common consensus is that MT-1/2 act neuroprotectively, via intracellular functions such as metal detoxification and quenching of oxidative free radicals. More recently, it has been demonstrated that MT-1/2 can be actively secreted by astrocytes under certain pathophysiological conditions [15], and subsequently act from an extracellular location directly upon neurons to activate intracellular neuroprotective pathways [15,31,32]. However, an unexpected and specific protective function of MT in the AD brain has recently been proposed by Meloni and colleagues [23], who have found that Zn<sub>7</sub>MT-3 is able to prevent copper-mediated aggregation of A $\beta$  *in vitro*, and protect a neuronal cell line from soluble A $\beta$ <sub>1-40</sub> toxicity. There is some controversy over the level of expression of MT-3 in the AD brain, although it appears that expression is downregulated in AD. Furthermore, the expression of MT-3 is not induced by metals or oxidative stress, and this protein displays neurotoxic actions under some conditions [14,26], suggesting that it is unlikely that this protein contributes greatly to a protective mechanism against A $\beta$  aggregation and toxicity. The MT-1/2 isoforms however (as exemplified by MT-2A) are broadly expressed within the adult brain, and greatly elevated levels of expression of these proteins have been noted in the AD brain [20-22].

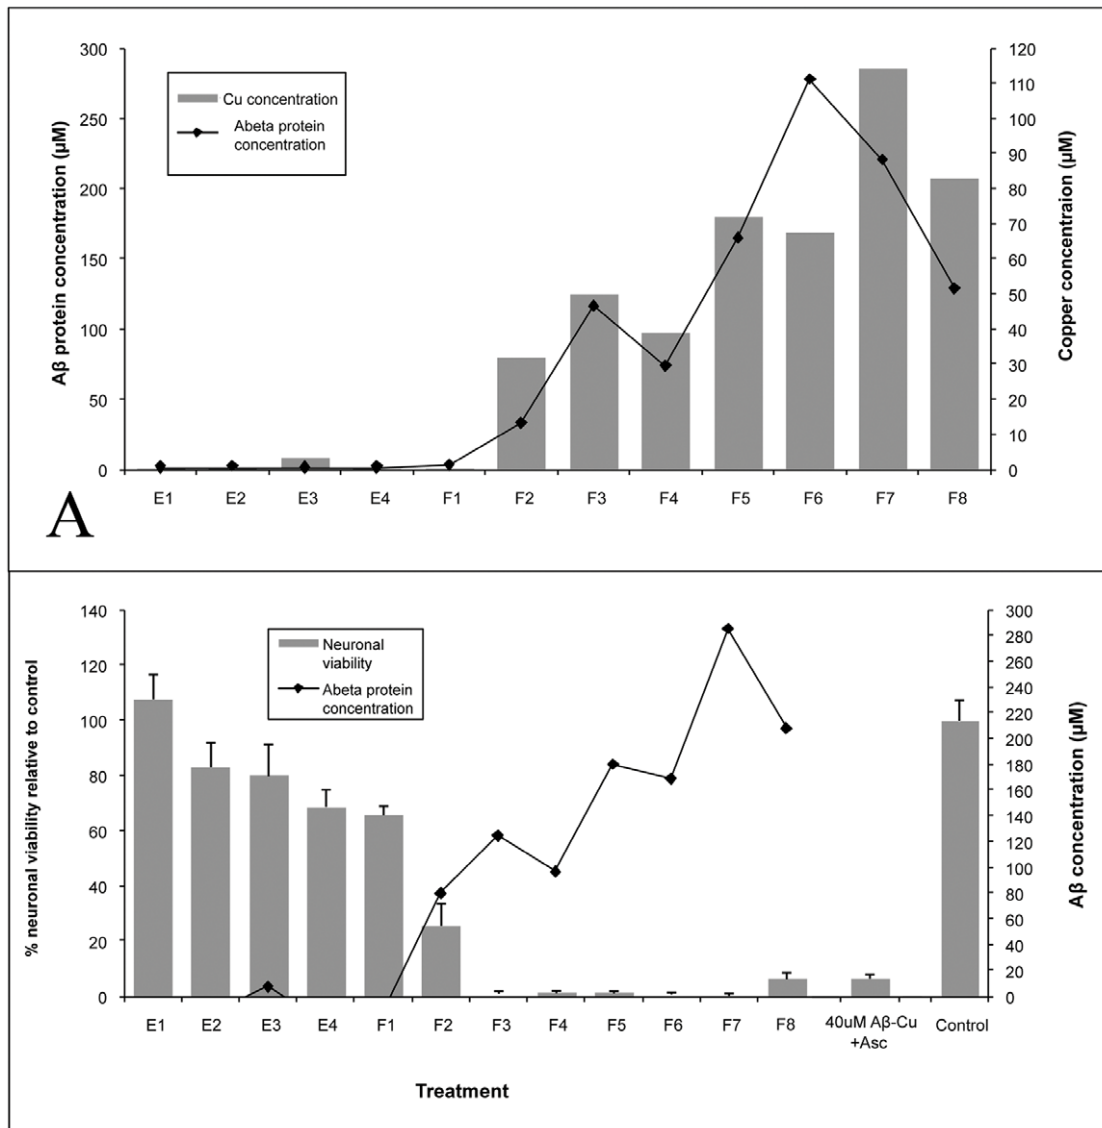

**Figure 4. A 40 $\mu$ M Cu(II)-A $\beta$ <sub>1-40</sub> solution was separated on a PD MidiTrap™ G-25 column, and the protein (A280) and metal (ICP-MS) content of each fraction determined (A). Only those fractions containing A $\beta$  peptide also contained copper (A), indicating that the Cu(II)-A $\beta$ <sub>1-40</sub> solution did not contain any free copper ions. The neurotoxicity of all fractions was subsequently tested, and only those containing Cu(II)-A $\beta$ <sub>1-40</sub> exhibited neurotoxic activity (B). E – eluate, F – collected fraction. doi:10.1371/journal.pone.0012030.g004**

We now report that MT-2A is also capable of preventing copper-mediated A $\beta$  aggregation (both A $\beta$ <sub>1-40</sub> and A $\beta$ <sub>1-42</sub>), and that this involves a specific metal exchange interaction. Hence, Zn<sub>7</sub>MT-2A (but not Cu<sub>10</sub>MT-2A or CaMeMT-2A) prevents soluble Cu(II)-A $\beta$ <sub>1-40</sub> from forming SDS-insoluble A $\beta$ <sub>1-40</sub> aggregates. This observation might be explained by the well-characterised ability of higher binding affinity metals (ie: copper) to displace lower affinity metals (ie: zinc) within MT [for review see 33]. Similarly, published reports indicate that A $\beta$  has a Cu(II) binding affinity of between 10<sup>-6</sup> to 10<sup>-11</sup> [34,35], while MT-2A has been reported to have a binding affinity for Cu(II) of 10<sup>-19</sup> [36]. This supports the proposition that MT-2A is capable of removing Cu(II) ions from Cu(II)-A $\beta$ . Interestingly, we found that apo-MT-2A (metal free MT-2A) was unable to prevent soluble Cu(II)-A $\beta$  from forming SDS-insoluble A $\beta$  aggregates. Apo-MT-2A has a high affinity for free copper

initially suggesting that it might be able to extract Cu from A $\beta$  aggregates. It is possible that the apo-MT rapidly becomes oxidised (via disulphide-bond formation between cysteine residues), which would prevent apo-MT from binding to metals. Or it might be that the ability of MT to participate in an intermolecular interaction with A $\beta$  under biological conditions is dependent on not just the relative copper binding affinity between the two proteins, but also on the tertiary structure of the zinc-metallated form of metallothionein, which is fundamentally different to the uncoordinated structure found in the apo-thionein. Finally, ICP-MS demonstrated that there was almost 40% less copper in the pellet fraction when Cu(II)-A $\beta$  was aggregated in the presence of Zn<sub>7</sub>MT-2A. In summary, we provide strong evidence that a metal exchange between Cu(II)-A $\beta$  and Zn<sub>7</sub>MT-2A is responsible for blocking the aggregation of A $\beta$  into an insoluble form.

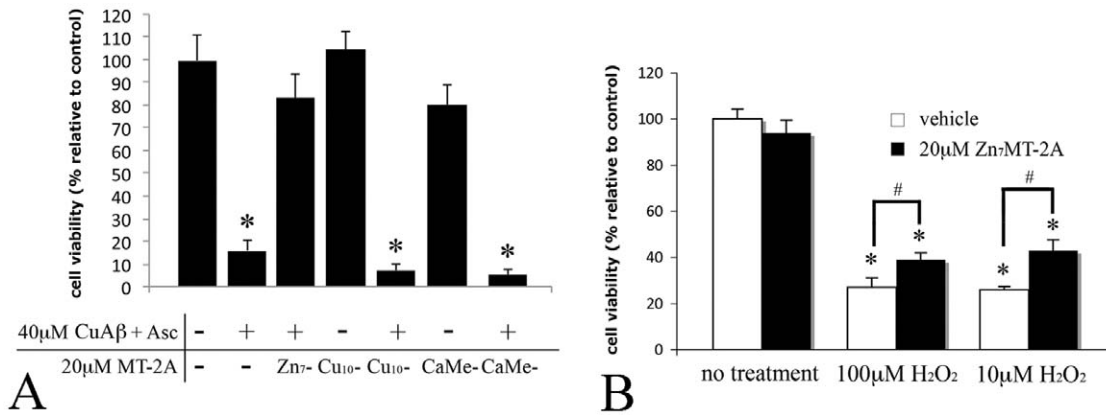

**Figure 5. Treatment with 20µM Cu<sub>10</sub>MT-2A or CaMeMT-2A had no protective effect against 40µM A $\beta$ <sub>1-40</sub> (in the presence of 40µM CuCl<sub>2</sub> and 300µM ascorbate) (A).** Treatment of cortical neurons with 10µM or 100µM H<sub>2</sub>O<sub>2</sub> for two hours resulted in substantial neuronal death, which was not prevented by co-treatment with 20µM Zn<sub>7</sub>MT-2A (B). Error bars represent standard error of the mean calculated from at least three experimental replicates. In panel A, \* - p<0.05 compared to untreated cells (One-Way ANOVA). In panel B, Two-Way ANOVA analysis was performed, and \* - p<0.05 compared to untreated cells, # - p<0.05 between treatments. doi:10.1371/journal.pone.0012030.g005

In our studies, we noted that Zn<sub>7</sub>MT-2A was effective at 10-fold lower concentrations than Zn<sub>7</sub>MT-3 in preventing copper-mediated A $\beta$ <sub>1-40</sub> aggregation. We predict that this difference

might be related to the relative copper binding affinities of MT-2A and MT-3, and based upon our experiments with chimeric MT proteins we believe that the  $\alpha$ -domain of MT-2A is particularly

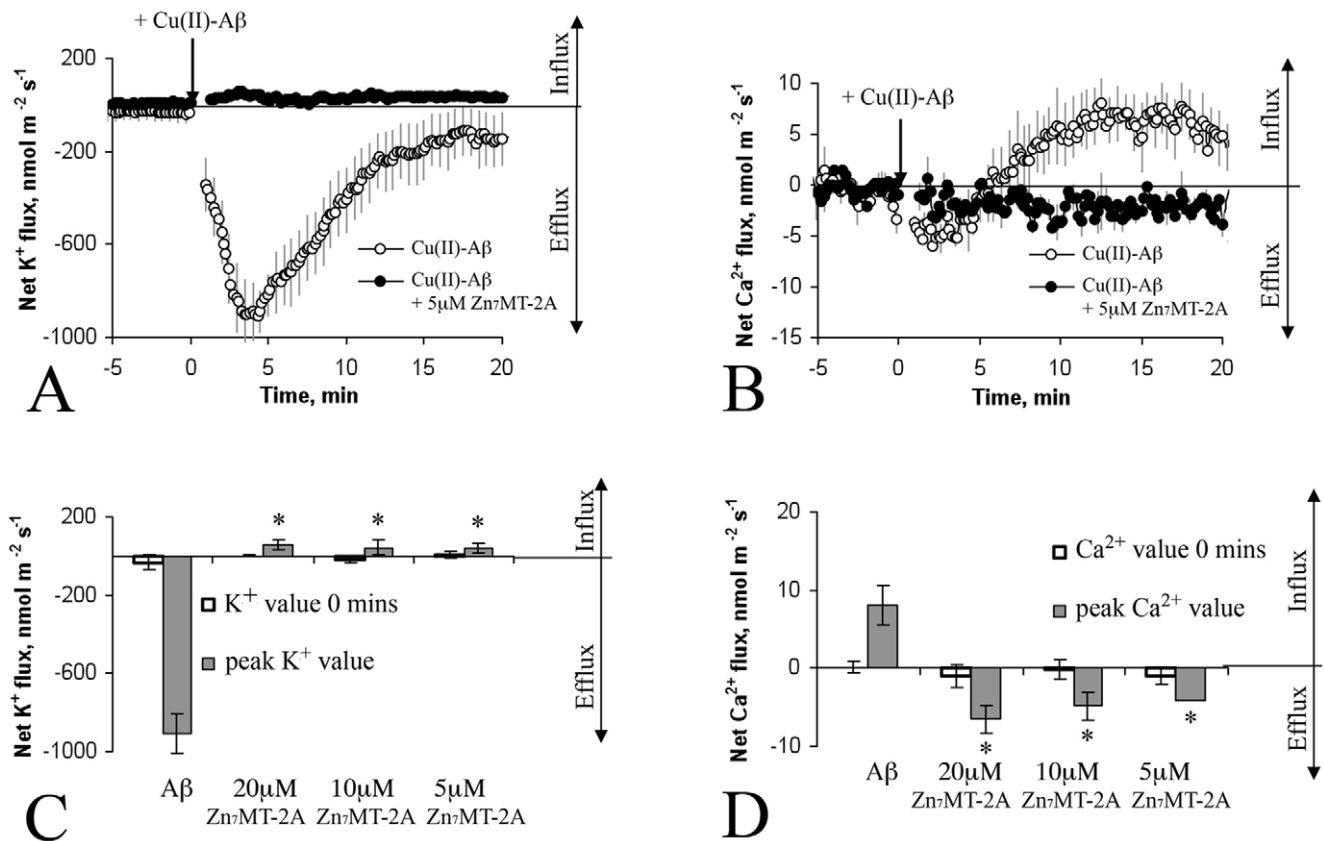

**Figure 6. A non-invasive microelectrode ionic flux measuring (MIFE) technique was used to measure the kinetics of K<sup>+</sup> and Ca<sup>2+</sup> fluxes simultaneously in response to Cu(II)-A $\beta$  and Zn<sub>7</sub>MT-2A.** Treatment with 40µM Cu(II)A $\beta$ <sub>1-40</sub> resulted in a massive efflux of K<sup>+</sup> out of neurons (A), and Ca<sup>2+</sup> influx into neurons (B). Quantification of net ion flux revealed that co-treatment with Zn<sub>7</sub>MT-2A completely blocked Cu(II)A $\beta$ -induced changes in K<sup>+</sup> (A and C) and Ca<sup>2+</sup> fluxes (B and D), at a concentration of >5mM. For all MIFE data, the sign convention is “influx positive”. Error bars represent standard error of the mean calculated from at least three different experiments. \* - p<0.05 compared to Cu(II)-A $\beta$  treated cells (One-Way ANOVA). doi:10.1371/journal.pone.0012030.g006

important in this activity. We note that the relative affinity of the  $\alpha$ - and  $\beta$ - domains of MT for copper means that the activity of MT-2A and MT-3 towards copper-induced A $\beta$  aggregation will probably depend on the molar ratio of MT to A $\beta$ . In this regard, it is generally considered that the  $\beta$ -domain of MT fills with copper first, followed by the  $\alpha$ -domain. We show that MT-2A will prevent aggregation of Cu(II)-A $\beta$  even at low relative levels of this isoform (eg 0.5–5  $\mu$ M MT to 25  $\mu$ M A $\beta$ ), whereas MT-3 requires a higher MT:A $\beta$  ratio (25  $\mu$ M MT to 25  $\mu$ M A $\beta$ ) for activity. This most likely also explains the difference between MT-2A and MT-3 in the neurotoxicity data, in which we used 40 $\mu$ M Cu(II)-A $\beta$  to 20 $\mu$ M MT. We predict that when the ratio of A $\beta$  to MT is equimolar that it will be primarily the  $\beta$ -domains of MT that will be filled with copper, and that in this scenario MT-2A and MT-3 will protect equally against Cu(II)-A $\beta$  neurotoxicity.

We also found that Zn<sub>7</sub>MT-2A protects neurons against Cu(II)-A $\beta$  toxicity. We believe that this involves a zinc/copper metal-exchange between Zn<sub>7</sub>MT-2A and Cu(II)-A $\beta$  that subsequently prevents A $\beta$ -bound copper from participating in redox-reactions and producing reactive oxygen species [as suggested in 23]. Hence, only Zn<sub>7</sub>MT-2A but not Cu<sub>10</sub>MT-2A or CaMeMT-2A was capable of protecting cortical neurons from soluble Cu(II)-A $\beta$  neurotoxicity. Notably, Cu<sub>10</sub>MT-2A itself was not toxic to neurons, indicating that when copper is bound to MT (for instance following metal-swap with Cu(II)-A $\beta$ ) that it is unable to produce ROS. As evidence that MT-2A is not acting downstream by scavenging the H<sub>2</sub>O<sub>2</sub> generated by Cu(II)-A $\beta$ , we found that Zn<sub>7</sub>MT-2A provided only a small degree of protection against direct H<sub>2</sub>O<sub>2</sub> neurotoxicity. This suggests that Zn<sub>7</sub>MT-2A neuroprotection against Cu(II)-A $\beta$  is primarily afforded through a zinc/copper metal swap and subsequent inhibition of H<sub>2</sub>O<sub>2</sub> generation. We do note that it is possible that when Cu(II)-A $\beta$  is applied to neurons that some copper is released from the complex, and that this free copper is also partly responsible for neurotoxicity. Although, as noted by Meloni et al [23], we think that only a small amount of copper is released from Cu(II)-A $\beta$  upon addition into the culture medium and the primary cause of neurotoxicity is the Cu(II)-A $\beta$  complex.

Finally, using a direct and sensitive technique, MIFE, to measure the kinetics of ion fluxes, we were able to determine that oxidative stress (H<sub>2</sub>O<sub>2</sub>) generated by soluble Cu(II)-A $\beta$  induces a rapid net efflux of K<sup>+</sup> and mild net influx of Ca<sup>2+</sup> into cortical neurons most likely via increased oxidative stress. Notably, K<sup>+</sup> efflux from cells is a well established trigger of apoptosis. These observations are also in accordance with the results of other groups who have demonstrated that H<sub>2</sub>O<sub>2</sub> induces substantial dysregulation in neuronal K<sup>+</sup> channel conductance [37] and calcium homeostasis [38]. Importantly, we found that treatment with Zn<sub>7</sub>MT-2A completely abolished the Cu(II)-A $\beta$ -induced changes in K<sup>+</sup> and Ca<sup>2+</sup> net ion fluxes. Taken together, our data suggests that the neuroprotective actions of MT-2A lie in its ability to exchange metals with Cu(II)-A $\beta$  to stop production of ROS, and preventing subsequent detrimental changes in ionic balance within neurons.

We believe that our results may reflect a physiological action of MT-2A in the Alzheimer's brain. For instance, MT-1/2 levels in the adult human brain have been reported to be approximately 40 $\mu$ g/g [39]. Expression is primarily by astrocytes, with very low levels of MT-2A expressed in neurons. We have recently reported that secretion of MT-2A by cultured astrocytes can be induced under certain physiological conditions and that extracellular MT-2A can be detected in the site of a physical injury to the brain [15]. Hence, it is conceivable that under stressful situations MT-2A may be secreted from astrocytes into the synaptic vicinity and reach the

levels that we have demonstrated are capable of modulating Cu-mediated A $\beta$  aggregation.

Because of the considerable published data linking metal-binding to the aggregation of A $\beta$ , metal-chelation drugs have been proposed as a potential therapy for AD [40,41]. An excellent example of this approach is the administration of the copper- and zinc- chelating drug clioquinol, which has been reported to prevent plaque formation in transgenic AD mice [42]. The use of such metal-chelating drugs might not only reduce metal-mediated aggregation of A $\beta$ , but also limit the formation of Cu(II)-A $\beta$  and thus prevent the generation of oxidative stress and subsequent neurotoxicity. One criticism of metal-chelation therapies for AD is that these chelating agents remove metal from A $\beta$  leaving a metal-free A $\beta$  that could feasibly readily bind metals again. Hence, more recently, metal redistribution has been proposed as a more appropriate goal of metal-targeted strategies for AD [41]. In this regard, we believe that MT-2A might represent a possible candidate as a metal-redistribution therapeutic agent, as the metal exchange between MT and A $\beta$  leaves the A $\beta$  in a Zn-bound non-toxic form, and redistributes copper into an inert Cu-MT form.

In summary we provide compelling evidence that MT-2A can protect against copper-induced A $\beta$  aggregation and neurotoxicity. This action of MT-2A appears to involve a metal-swap between Zn<sub>7</sub>MT-2A and Cu(II)-A $\beta$ . Furthermore MT-2A can block Cu(II)-A $\beta$  induced changes in ion homeostasis and neurotoxicity of cultured cortical neurons. We propose that there is therapeutic potential in a MT-2A based approach to reducing A $\beta$  deposition in AD.

## Methods

### Metallothionein protein

MT proteins were provided by Bestenbalt LLC (Estonia) as >98% pure HPLC-purified proteins. For this study we have used Zn<sub>7</sub>MT-2A, Zn<sub>7</sub>MT-3, and different metallated forms of MT-2A including Cu<sub>10</sub>MT-2A and carboxymethylated MT-2A (CaMeMT-2A). All MT proteins were provided directly from Bestenbalt in lyophilised form in either a metal free (apo), or in Zn<sub>7</sub>MT or C<sub>10</sub>MT state. Metallation of MT-2A was prepared as we have described previously for Zn<sub>7</sub>MT-3 [43]. Briefly, the protein was dissolved in 20 mM Tris-HCl, pH 8 and the pH was lowered to 2.5. Ten equivalents of Zn<sup>2+</sup> or 12 equivalents of Cu<sup>+</sup> was added and the pH raised to 8. The buffer was exchanged to 10 mM ammonium bicarbonate, and the solution frozen at -80°C and freeze dried. The lyophilised proteins were reconstituted in Milli-Q water (pH 7.4) immediately prior to use.

### In vitro copper-mediated A $\beta$ aggregation assay

Synthetic monomeric A $\beta$ <sub>1-40</sub> and A $\beta$ <sub>1-42</sub> were purchased from EZBiolab (US). The dried A $\beta$  peptide contains trifluoroacetate (TFA) as a counterion, and in analysis it was found that the synthetic A $\beta$  used in this study contained approximately 5–10% TFA. For *in vitro* A $\beta$  aggregation studies, purified A $\beta$ <sub>1-40</sub> and A $\beta$ <sub>1-42</sub> (EZBiolab) was dissolved in Tris buffer (20mM Tris-HCl, 100mM NaCl, pH 7.4) to give a 25 $\mu$ M solution, followed by addition of an equimolar concentration of CuCl<sub>2</sub> and 200 $\mu$ M ascorbate. The solution was incubated at 37°C for 72hrs with shaking (300 rpm). A $\beta$  aggregation was assessed by gel electrophoresis. Briefly, aggregates were collected by ultracentrifugation at 20,000G for 1 hour then resuspended in LDS (lithium dodecyl sulfate) sample buffer (Invitrogen) and electrophoresed under reducing conditions ( $\beta$ -mercaptoethanol in sample and Invitrogen anti-oxidant supplement in the running buffer) on a 10% Nu-Page Bis-Tris gel (Invitrogen) at 200V for 30 minutes. Protein bands



were visualized using Coomassie brilliant blue stain. Aggregates were assessed as SDS-soluble when the A $\beta$  protein was observed in monomeric form on the gel and as SDS-insoluble when not observed on the gel.

### Electrospray ionisation mass spectrometry (ESI-MS) metal binding analysis

Copper binding affinity of MT-3 was determined in strictly similar conditions and by identical approach, which we have recently elaborated for MT-2A [24]. Briefly, 3.3  $\mu$ M samples of apo-MT-3 were reconstituted with Cu(I) by addition of 12 equivalents of Cu(I)DTT complex in 20 mM ammonium acetate pH 7.5 in the presence of 10 mM DTT. After addition of various concentrations of Cu(I)-chelating reagent diethyl dithio carbamate (DETC), samples were incubated for 2 minutes and injected into the electrospray ion source of QSTAR Elite ESI-Q-TOF MS instrument (Applied Biosystems, Foster City, USA) by a syringe pump at 6  $\mu$ l/min and ESI-MS spectra were recorded over a 5 minute period in m/Z region from 500–3000 Da at following instrument parameters: ion spray voltage 5500 V; source gas 45 l/min; curtain gas 20 l/min; declustering potential 60V; focusing potential 320 V; detector voltage 2300V.

The Cu-binding affinity of MT-3 was determined from ESI-MS titration results of Cu<sub>12</sub>MT-3 with DETC by correlating the fractional occupancy of Cu(I)-binding sites in MT-3 with the concentration of free Cu(I) ions. The fractional occupancy of Cu(I)-binding sites in MT-3 (Y) was calculated from ESI-MS spectra (considering that there are 12 Cu(I) binding sites in MT-3) by using the following equation:

$$Y = \frac{\sum_0^{12} n I_{Cu_n MT-3}}{12 \times \sum_0^{12} I_{Cu_n MT-3}} \quad (1)$$

where  $I_{Cu_n MT-3}$  denotes the intensity of the Cu<sub>n</sub>MT-3 peak in the ESI-MS spectra. The fractional occupancy of Cu(I) binding sites in MT-3 was correlated with the concentration of free Cu(I) ions in the sample calculated using the apparent dissociation constant for DETC that we have recently determined using the same techniques ( $K_{Cu} = 13.8$  fM) [24]. The obtained binding curve for MT-3, presented in **Fig. 2C**, was fitted nonlinearly with the Hill equation (equation 2) and also linearly to the linear version of the Hill equation with the program “Origin 6.1” (OriginLab Corporation, USA).

$$Y = \frac{[Cu(I)]^n}{K_{Cu}^n + [Cu(I)]^n} \quad (2)$$

The nonlinear fitting presented in **Fig. 2C** yielded  $K_{Cu}$  values of  $0.47 \pm 0.01$  fM and n values of  $1.25 \pm 0.06$  and  $n = 1.34$  was obtained in linear fitting mode.  $K_{Cu}$  is equal to the concentration of free Cu(I) ions at half saturation of MT-3 with Cu(I) ions, reflecting the apparent average affinity of MT-3 towards Cu(I) ions, which is similar to that for MT-2  $K_{Cu}$  values of  $0.41 \pm 0.02$  fM [24]. A Hill coefficient close to 1 indicates that there exists only weak apparent positive cooperativity in the binding of Cu(I) ions to MT-3, whereas strong positive cooperativity ( $n = 3.3$ ) exists in case of MT-2, which is demetalated in very narrow range of free Cu(I) ions [24]. As seen from **Fig. 2B** there are two metal-thiolate clusters in Cu<sub>12</sub>MT-3, both composed from 6 Cu(I) ions. The first hexacopper-thiolate cluster dissociates readily in the presence of 0.5 mM DETC, whereas DETC can not dissociate copper from Cu<sub>10</sub>MT-2 even at 1 mM

concentration [24]. The second hexacopper-thiolate cluster of MT-3 is half desaturated at 3 mM DETC, which is similar to the behaviour of hexacopper-thiolate cluster in MT-2 [24].

### Inductively coupled plasma mass spectrometry (ICP-MS) metal content analysis

In some cases, the A $\beta$  aggregation pellet and supernatant fractions were collected post-ultracentrifugation and their metal content determined by Inductively Coupled Plasma Mass Spectrometry (ICP-MS). Prior to analysis samples were further diluted 10 $\times$  with ultra-pure water (>18 MOhm) with nitric acid and Indium (as an internal standard) addition to final concentrations 1% and 100 ppb, respectively. Analysis was undertaken using an ELEMENT High Resolution ICP-MS operating in medium resolution mode, enabling <sup>63</sup>Cu and <sup>66</sup>Zn isotopes to be monitored free from overlapping spectral interferences. Both elements were quantified using external calibration methodology, with blank subtraction. Typical analytical protocols have been presented previously [44].

### Rodent cortical neural cell cultures

All animal procedures were performed in accordance with the animal ethics guidelines of the University of Tasmania Animal Ethics Committee. Neural cultures were prepared as reported previously [45], and briefly involved the removal of cortices from embryonic day 17 Hooded Wistar embryos, which were incubated with 0.1% trypsin in HEPES buffer at 37°C for 20 minutes. After three washes with warmed HEPES, the tissue was triturated and plated at  $5 \times 10^4$  cells per coverslip onto 13mm<sup>2</sup> glass coverslips in Neurobasal medium (Gibco) and maintained at 37°C in humidified air containing 5% CO<sub>2</sub>.

### Rat cortical neuron toxicity assay

To induce cortical neuron toxicity, 40 $\mu$ M soluble A $\beta$ <sub>1–40</sub> was applied to neurons in the presence of 40 $\mu$ M CuCl<sub>2</sub> and 300 $\mu$ M ascorbate. Under these specific conditions, it has been demonstrated that all free copper is rapidly bound by A $\beta$ <sub>1–40</sub> [23]. The presence of physiological levels of ascorbate permits cycling between copper (II) and (I) oxidation states, as occurs within cellular environments allowing copper to bind to proteins in either Cu(I) or Cu(II) oxidation states. After 24 hours, neuronal viability was measured by the degree of cellular metabolic reduction of alamarBlue<sup>®</sup>, determined by fluorescence (excitation 535nm, emission 595nm), and was expressed as the percentage of the signal obtained from the vehicle-treated culture. A $\beta$ <sub>1–40</sub> was used in this study because there is a wider differential in the relative toxicity of copper vs zinc forms of A $\beta$ <sub>1–40</sub> compared to A $\beta$ <sub>1–42</sub> (ie: only Cu-A $\beta$ <sub>1–40</sub> and not Zn-A $\beta$ <sub>1–40</sub> is neurotoxic, while both Cu- and Zn-A $\beta$ <sub>1–42</sub> are neurotoxic). Using A $\beta$ <sub>1–40</sub> thus maximises the effect of the hypothesised metal swap between ZnMT-2A and Cu-A $\beta$ <sub>1–40</sub>, and removes the additional but complicating possibility that metallothionein can independently protect against Zn-A $\beta$ <sub>1–42</sub> toxicity.

### Statistical analyses of tissue culture experiments

For each experiment unless otherwise stated, a minimum of four wells from at least three separate cultures (derived from different animals), were used for quantification, blinded to conditions. Statistical analysis was completed using SPSS 16.0 (SPSS). When data was unequally distributed, data was transformed so that the residuals were approximately normally distributed. Statistical significance was calculated using One-Way and Two-Way ANOVA with Tukey’s Post Hoc Test. All graphical data is presented as mean  $\pm$  SEM, significance  $p < 0.05$ .

## Ion-selective flux measurements

The theory of non-invasive microelectrode ion flux (MIFE) measurements was reviewed recently [45] and the complete experimental procedure including ion-selective microelectrode fabrication and cell preparation and immobilisation are given elsewhere [46,47]. Cortical neurons for the MIFE measurements were grown for three days at a  $1 \times 10^5$  cells/well on poly-L-lysine cover slips as described above. By day three a dense monolayer of neurons had developed. Cells were washed in and adapted to the MIFE artificial CSF (aCSF) for one hour prior to experiments. The composition of the aCSF was: 150mM NaCl, 0.5mM KCl, 0.5mM CaCl<sub>2</sub>, 1.5mM MgCl<sub>2</sub>, 1.25mM NaH<sub>2</sub>PO<sub>4</sub>, 5mM NaHCO<sub>3</sub>, 25mM glucose, pH 7.2. Data was acquired at a rate of 15 samples/sec and later averaged over 10 second intervals. Each experiment was repeated upon at least four different coverslips from three different neuronal cultures.

## Supporting Information

**Figure S1** Direct cell counting revealed that treatment of 3DIV rat cortical neuron cultures with 40 $\mu$ M Cu(II)A $\beta$ 1–40 resulted in

significant neuronal death, which could be blocked by the co-addition of 20 $\mu$ M of Zn7MT-2A. Error bars represent standard error of the mean calculated from at least three different experiments. \* -  $p < 0.05$  (One-Way ANOVA).

Found at: doi:10.1371/journal.pone.0012030.s001 (3.21 MB TIF)

## Acknowledgments

We thank Bestenbalt, LLC, for providing metallothionein protein for this project. We thank Dr. Russell Thompson for his help with statistical analyses, and Dr. Ashley Townsend for his assistance with the ICP-MS.

## Author Contributions

Conceived and designed the experiments: RC CH EDE LS PP WRB JCV AW. Performed the experiments: RC CH EDE LS KZ PP AW SR. Analyzed the data: RC CH EDE LS KZ PP RS AW SR. Contributed reagents/materials/analysis tools: RC RS. Wrote the paper: RC CH PP JCV AW.

## References

- Blenow K, de Leon MJ, Zetterberg H (2006) Alzheimer's disease. *Lancet* 368: 387–403.
- Selkoe DJ, Podlisny MB (2002) Deciphering the genetic basis of Alzheimer's disease. *Annual Review of Genomics and Human Genetics* 3: 67–99.
- Glenner GG, Wong CW (1984) Alzheimers-Disease - Initial Report of the Purification and Characterization of a Novel Cerebrovascular Amyloid Protein. *Biochemical and Biophysical Research Communications* 120: 885–890.
- Mattson MP (2004) Pathways towards and away from Alzheimer's disease. *Nature* 430: 631–639.
- Haass C, Schlossmacher MG, Hung AY, Vigo-Pelfrey C, Mellon A, et al. (1992) Amyloid Beta-Peptide Is Produced by Cultured-Cells During Normal Metabolism. *Nature* 359: 322–325.
- Seubert P, Vigo-Pelfrey C, Esch F, Lee M, Dovey H, et al. (1992) Isolation and Quantification of Soluble Alzheimers Beta-Peptide from Biological-Fluids. *Nature* 359: 325–327.
- Busciglio J, Gabuzda DH, Matsudaira P, Yankner BA (1993) Generation of Beta-Amyloid in the Secretory Pathway in Neuronal and Nonneuronal Cells. *Proceedings of the National Academy of Sciences of the United States of America* 90: 2092–2096.
- Mesulam NM (1999) Neuroplasticity failure in Alzheimer's disease: Bridging the gap between plaques and tangles. *Neuron* 24: 521–529.
- Bush AI, Pettingell WH, Multhaup G, d Paradis M, Vonsattel JP, et al. (1994) Rapid induction of Alzheimer A beta amyloid formation by zinc. *Science* 265(5177): 1464–1467.
- Huang XD, Cuajungco MP, Atwood CS, Hartshorn MA, Tyndall JD, et al. (1999b) Cu(II) potentiation of Alzheimer A beta neurotoxicity. Correlation with cell-free hydrogen peroxide production and metal reduction. *Journal of Biological Chemistry* 274: 37111–37116.
- Adlard PA, Bush AI (2006) Metals and Alzheimer's disease. *J Alzheimers Dis* 10(2–3): 145–163.
- Cuajungco MP, Goldstein LE, Nunomura A, Smith MA, Lim JT, et al. (2000) Evidence that the beta-amyloid plaques of Alzheimer's disease represent the redox-silencing and entombment of A beta by zinc. *Journal of Biological Chemistry* 275: 19439–19442.
- Penkowa M, Carrasco J, Giralt M, Moos T, Hidalgo J (1999) CNS wound healing is severely depressed in metallothionein I- and II-deficient mice. *J Neurosci* 19(7): 2535–2545.
- Chung RS, Vickers JC, Chuah MI, West AK (2003) Metallothionein-IIA promotes initial neurite elongation and postinjury reactive neurite growth and facilitates healing after focal cortical brain injury. *Journal of Neuroscience* 23: 3336–3342.
- Chung RS, Penkowa M, Dittmann J, King CE, Bartlett C, et al. (2008) Redefining the Role of Metallothionein within the Injured Brain. *Journal of Biological Chemistry* 283: 15349–15358.
- Kagi JH, Kojima Y (1987) Chemistry and biochemistry of metallothionein. *Experientia Suppl* 52: 25–61.
- Coyle P, Philcox JC, Carey LC, Rofe AM (2002) Metallothionein: the multipurpose protein. *Cell Mol Life Sci* 59: 627–647.
- Kelly EJ, Palmiter RD (1996) A murine model of Menkes disease reveals a physiological function of metallothionein. *Nat Genet* 13: 219–222.
- Adlard PA, West AK, Vickers JC (1998) Increased density of metallothionein I/II-immunopositive cortical glial cells in the early stages of Alzheimer's disease. *Neurobiology of Disease* 5: 349–356.
- Richarz AN, Brätter P (2002) Speciation analysis of trace elements in the brains of individuals with Alzheimer's disease with special emphasis on metallothioneins. *Anal Bioanal Chem* 372(3): 412–417.
- Zambenedetti P, Giordano R, Zatta P (1998) Metallothioneins are highly expressed in astrocytes and microcapillaries in Alzheimer's disease. *J Chem Neuroanat* 15(1): 21–26.
- Carrasco J, Adlard P, Cotman C, Quintana A, Penkowa M, et al. (2006) Metallothionein-I and -III expression in animal models of Alzheimer disease. *Neuroscience* 143(4): 911–922.
- Meloni G, Sonois V, Delaine T, Guilloureaux L, Gillet A, et al. (2008) Metal swap between Zn-7-metlothionein-3 and amyloid-beta-Cu protects against amyloid-beta toxicity. *Nature Chemical Biology* 4: 366–372.
- Banci L, Bertini I, Ciofi-Baffoni S, Kozyreva T, Zovo K, et al. (2010) Affinity gradients drive copper to cellular destinations. *Nature* 465(7298): 645–648.
- Cardoso SM, Rego AC, Pereira C, Oliveira CR (2005) Protective effect of zinc on amyloid-beta 25–35 and 1–40 mediated toxicity. *Neurotox Res* 7(4): 273–281.
- Uchida Y, Takio K, Titani K, Ihara Y, Tomonaga M (1991) The growth inhibitory factor that is deficient in the Alzheimer's disease brain is a 68 amino acid metallothionein-like protein. *Neuron* 7(2): 337–347.
- Chung RS, Vickers JC, Chuah MI, Eckhardt BL, West AK (2002) Metallothionein-III inhibits initial neurite formation in developing neurons as well as postinjury, regenerative neurite sprouting. *Experimental Neurology* 178: 1–12.
- Huang X, Atwood CS, Hartshorn MA, Multhaup G, Goldstein LE, et al. (1999) The A beta peptide of Alzheimer's disease directly produces hydrogen peroxide through metal ion reduction. *Biochemistry* 38(24): 7609–7616.
- Chung RS, Adlard PA, Dittmann J, Vickers JC, Chuah MI, West AK (2004) Neuron-glia communication: metallothionein expression is specifically up-regulated by astrocytes in response to neuronal injury. *Journal of Neurochemistry* 88: 454–461.
- Trendelenburg G, Prass K, Priller J, Kapinya K, et al. Serial analysis of gene expression identifies metallothionein-II as major neuroprotective gene in mouse focal cerebral ischemia. *J Neurosci* 22(14): 5879–5888.
- Ambjorn M, Asmussen JW, Lindstam M, Gotfryd K, Jacobsen C, et al. (2008) Metallothionein and a peptide modeled after metallothionein, EmtinB, induce neuronal differentiation and survival through binding to receptors of the low-density lipoprotein receptor family. *J Neurochem* 104(1): 21–37.
- Fitzgerald M, Naim P, Bartlett CA, Chung RS, West AK, et al. (2007) Metallothionein-IIA promotes neurite growth via the megalin receptor. *Exp Brain Res* 183: 171–180.
- Hidalgo J, Aschner M, Zatta P, Vasák M (2001) Roles of the metallothionein family of proteins in the central nervous system. *Brain Res Bull* 55(2): 133–45.
- Syme CD, Nadal RC, Rigby SE, Viles JH (2004) Copper binding to the amyloid-beta (A $\beta$ ) peptide associated with Alzheimer's disease: folding, coordination geometry, pH dependence, stoichiometry, and affinity of A $\beta$ (1–28): insights from a range of complementary spectroscopic techniques. *J Biol Chem* 279(18): 18169–18177.
- Guilloureaux L, Damian L, Coppel Y, Mazarguil H, Winterhalter M, et al. (2006) Structural and thermodynamical properties of CuII amyloid-beta<sub>16/28</sub> complexes associated with Alzheimer's disease. *J Biol Inorg Chem* 11(8): 1024–1038.
- Hamer DH (1986) Metallothionein. *Annu Rev Biochem* 55: 913–5135.

37. Wake H, Watanabe M, Moorhouse AJ, Kanematsu T, Horibe S, et al. (2007) Early changes in KCC2 phosphorylation in response to neuronal stress result in functional downregulation. *J Neurosci* 27(7): 1642–1650.
38. Pouokam E, Rehn M, Diener M (2009) Effects of H<sub>2</sub>O<sub>2</sub> at rat myenteric neurones in culture. *Eur J Pharmacol* 615(1–3): 40–49.
39. Erickson JC, Sewell AK, Jensen LT, Winge DR, Palmiter RD (1994) Enhanced neurotrophic activity in Alzheimer's disease cortex is not associated with down-regulation of metallothionein-III (GIF). *Brain Res* 649: 297–304.
40. Gaeta A, Hider RC (2005) The crucial role of metal ions in neurodegeneration: the basis for a promising therapeutic strategy. *Br J Pharmacol* 146(3): 1041–59.
41. Hegde ML, Bharathi P, Suram A, Venugopal C, Jagannathan R, et al. (2009) Challenges associated with metal chelation therapy in Alzheimer's disease. *J Alzheimers Dis* 17(3): 457–468.
42. Cherny RA, Atwood CS, Xilinas ME, Gray DN, Jones WD, et al. (2001) Treatment with a copper-zinc chelator markedly and rapidly inhibits beta-amyloid accumulation in Alzheimer's disease transgenic mice. *Neuron* 30(3): 665–676.
43. Eriste E, Kruusel K, Palumaa P, Jörnvall H, Sillard R (2003) Purification of recombinant human apometallothionein-3 and reconstitution with zinc. *Protein Expr Purif* 31: 161–165.
44. Townsend AT (2000) Enhanced sensitivity for Os isotope ratios by magnetic sector ICP-MS with a capacitive decoupling Pt guard electrode. *Fresenius J Anal Chem* 367: 614–620.
45. Chung RS, McCormack GH, King AE, West AK, Vickers JC (2005) Glutamate induces rapid loss of axonal neurofilament proteins from cortical neurons in vitro. *Exp Neurol* 193: 481–488.
46. Shabala L, Ross T, McMeekin T, Shabala S (2006a) Non-invasive microelectrode ion flux measurements to study adaptive responses of microorganisms to the environment. *FEMS Microbiol Rev* 30: 472–486.
47. Shabala L, Ross T, Newman I, McMeekin T, Shabala S (2001) Measurements of net fluxes and extracellular changes of H<sup>+</sup>, Ca<sup>2+</sup>, K<sup>+</sup>, and NH<sub>4</sub><sup>+</sup> in *Escherichia coli* using ion -selective microelectrodes. *J Microbiol Methods* 46: 119–129.
